# Supplementary material for: Lacticaseibacillus paracasei JS-3 Isolated from “Jiangshui” Ameliorates Hyperuricemia by Regulating Gut Microbiota and iTS Metabolism
Source: MDPI journal article supplement (doi:10.3390/foods13091371), 2024-04-29
Supplement: s1 [file s1]

Table S1 Survival rate of JS-3 in artificial gastric and intestinal fluids

| simulated<br>liquid | artificial gastric juice | simulated intestinal fluid |             |
|---------------------|--------------------------|----------------------------|-------------|
|                     | 3h                       | 4h                         | 8h          |
| PH=2                | 55.6±19.04               | 41.64±6.14                 | 43.44±10.24 |
| PH=3                | 92.06±7.58               | 99.28±5.05                 | 98.68±2.71  |
| PH=4                | 94.22±11.55              | 95.31±6.29                 | 92.9±10.38  |
