# Supplementary material for: Lacticaseibacillus paracasei JS-3 Isolated from “Jiangshui” Ameliorates Hyperuricemia by Regulating Gut Microbiota and iTS Metabolism
Source: MDPI journal article supplement (doi:10.3390/foods13091371), 2024-04-29
Supplement: s1 [file s1]

Table S2: Potential biomarker information. The up (↑) and down (↓) arrows represent the relative increasing or decreasing trend of the metabolites.

| No. | Rt/<br>(min) | m/z       | metabolites                                  | Chemical<br>formula                                                | mode                              | JS3 vs<br>Model |
|-----|--------------|-----------|----------------------------------------------|--------------------------------------------------------------------|-----------------------------------|-----------------|
| 1   | 0.69         | 381.07907 | Dihydrocaffeic acid<br>3-O-glucuronide       | C <sub>15</sub> H <sub>18</sub> O <sub>10</sub>                    | [M+Na] <sup>+</sup>               | ↓               |
| 2   | 0.737        | 118.08643 | 2-Pentenoic acid                             | C <sub>5</sub> H <sub>8</sub> O <sub>2</sub>                       | [M+H] <sup>+</sup>                | ↓               |
| 3   | 0.792        | 195.05084 | Gulonic acid                                 | C <sub>6</sub> H <sub>12</sub> O <sub>7</sub>                      | [M-H] <sup>-</sup>                | ↓               |
| 4   | 0.955        | 262.12878 | O-Methylmalonylcarnitine                     | C <sub>11</sub> H <sub>19</sub> NO <sub>6</sub>                    | [M+H] <sup>+</sup>                | ↓               |
| 5   | 0.959        | 169.03571 | Uric acid                                    | C <sub>5</sub> H <sub>4</sub> N <sub>4</sub> O <sub>3</sub>        | [M+NH <sub>4</sub> ] <sup>+</sup> | ↓               |
| 6   | 1.071        | 151.02625 | Xanthine                                     | C <sub>5</sub> H <sub>4</sub> N <sub>4</sub> O <sub>2</sub>        | [M-H] <sup>-</sup>                | ↑               |
| 7   | 1.422        | 276.14417 | Glutaryl carnitine                           | C <sub>12</sub> H <sub>21</sub> NO <sub>6</sub>                    | [M+H] <sup>+</sup>                | ↑               |
| 8   | 1.859        | 434.18863 | Acetophenazine                               | C <sub>23</sub> H <sub>29</sub> N <sub>3</sub> O <sub>2</sub><br>S | [M+H] <sup>+</sup>                | ↓               |
| 9   | 6.161        | 162.056   | 4-(3-Pyridyl)-3-butenic acid                 | C <sub>9</sub> H <sub>9</sub> NO <sub>2</sub>                      | [M-H] <sup>-</sup>                | ↑               |
| 10  | 6.161        | 206.04559 | 4-(2-Aminophenyl)-2,4-dioxobutan<br>oic acid | C <sub>10</sub> H <sub>9</sub> NO <sub>4</sub>                     | [M-H] <sup>-</sup>                | ↑               |
| 11  | 6.216        | 162.05493 | 4,6-Dihydroxyquinoline                       | C <sub>9</sub> H <sub>7</sub> NO <sub>2</sub>                      | [M+H] <sup>+</sup>                | ↓               |
| 12  | 7.156        | 187.00702 | p-Cresol sulfate                             | C <sub>7</sub> H <sub>8</sub> O <sub>4</sub> S                     | [M-H] <sup>-</sup>                | ↓               |
| 13  | 7.458        | 493.27911 | Erinacine P                                  | C <sub>27</sub> H <sub>40</sub> O <sub>8</sub>                     | [M+H] <sup>+</sup>                | ↓               |
| 14  | 9.776        | 381.19144 | 12-Oxo-20-trihydroxy-leukotriene<br>B4       | C <sub>20</sub> H <sub>30</sub> O <sub>7</sub>                     | [M-H] <sup>-</sup>                | ↑               |
| 15  | 9.783        | 464.33389 | 3-Hydroxy-9Z-octadecenoylcarnitin<br>e       | C <sub>25</sub> H <sub>47</sub> NO <sub>5</sub>                    | [M+H] <sup>+</sup>                | ↓               |
| 16  | 9.8          | 589.31134 | 25-Cinnamoyl-vulgaroside                     | C <sub>34</sub> H <sub>46</sub> O <sub>7</sub>                     | [M+H] <sup>+</sup>                | ↑               |
| 17  | 10.437       | 503.26459 | Withaperuvine B                              | C <sub>28</sub> H <sub>38</sub> O <sub>8</sub>                     | [M+Na] <sup>+</sup>               | ↑               |
| 18  | 10.536       | 518.27454 | Travoprost                                   | C <sub>26</sub> H <sub>35</sub> F <sub>3</sub> O <sub>6</sub>      | [M+Na] <sup>+</sup>               | ↑               |
| 19  | 12.077       | 462.2673  | desmethylnestemizole                         | C <sub>27</sub> H <sub>29</sub> FN <sub>4</sub> O                  | [M+NH <sub>4</sub> ] <sup>+</sup> | ↓               |
| 20  | 12.121       | 512.26813 | Sulfolithocholylglycine                      | C <sub>26</sub> H <sub>43</sub> NO <sub>7</sub> S                  | [M-H] <sup>-</sup>                | ↓               |

| No. | Rt/<br>(min) | m/z       | metabolites                                | Chemical<br>formula                               | mode               | JS3 vs<br>Model |
|-----|--------------|-----------|--------------------------------------------|---------------------------------------------------|--------------------|-----------------|
| 21  | 12.207       | 514.28308 | Taurallocholic acid                        | C <sub>26</sub> H <sub>45</sub> NO <sub>7</sub> S | [M-H] <sup>-</sup> | ↓               |
| 22  | 14.394       | 407.27982 | alpha-Muricholic acid                      | C <sub>24</sub> H <sub>40</sub> O <sub>5</sub>    | [M-H] <sup>-</sup> | ↑               |
| 23  | 14.551       | 471.24176 | Ursodeoxycholic acid 3-sulfate             | C <sub>24</sub> H <sub>40</sub> O <sub>7</sub> S  | [M-H] <sup>-</sup> | ↑               |
| 24  | 16.921       | 595.38379 | Asparagoside B                             | C <sub>33</sub> H <sub>56</sub> O <sub>9</sub>    | [M-H] <sup>-</sup> | ↓               |
| 25  | 17.475       | 438.26227 | Dodecanoyl-sn-glycero-3-phosphoc<br>holine | C <sub>20</sub> H <sub>42</sub> NO <sub>7</sub> P | [M-H] <sup>-</sup> | ↑               |
| 26  | 18.44        | 452.27808 | LysoPE(16:0/0:0)                           | C <sub>21</sub> H <sub>44</sub> NO <sub>7</sub> P | [M-H] <sup>-</sup> | ↑               |
