# Supplementary figures and images for: Lacticaseibacillus paracasei JS-3 Isolated from “Jiangshui” Ameliorates Hyperuricemia by Regulating Gut Microbiota and iTS Metabolism
Source: MDPI journal article supplement (doi:10.3390/foods13091371), 2024-04-29

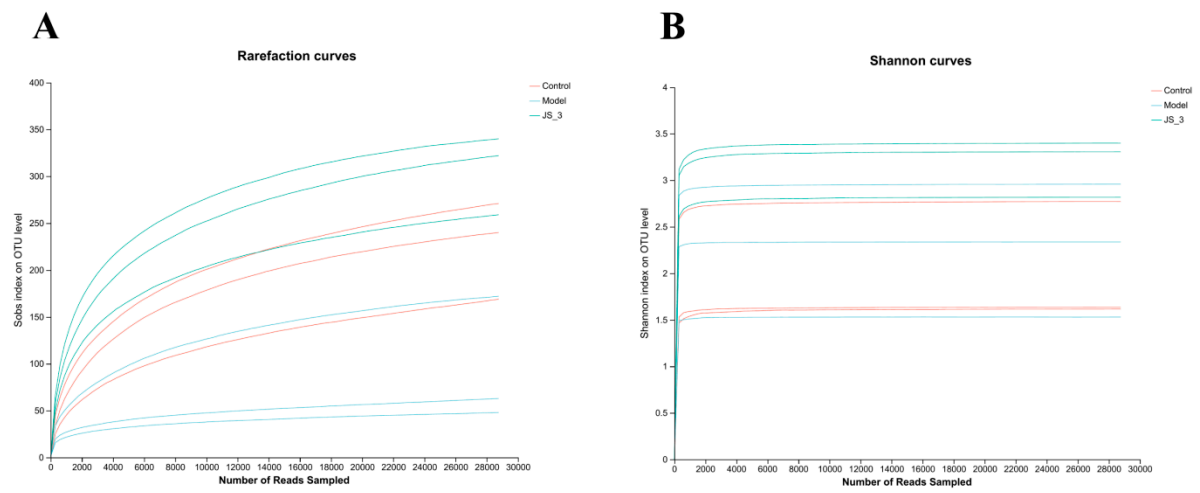

Fig. S1. Rarefaction curve (A) Sobs index, (B) Shannon index.

Supplement: s1 [file s1]
